# Supplementary material
Source: Elsevier journal article supplement (https://rcastoragev2.blob.core.windows.net/06dacf98ce1919a049c4aaf924b9e3ed/mmc1.pdf)
Supplement: mmc1 [file mmc1.pdf]

**Supplemental Information**

**Mitochondrial Integrity Regulated  
by Lipid Metabolism Is a Cell-Intrinsic  
Checkpoint for Treg Suppressive Function**

**Cameron S. Field, Francesc Baixauli, Ryan L. Kyle, Daniel J. Puleston, Alanna M. Cameron, David E. Sanin, Keli L. Hippen, Michael Loschi, Govindarajan Thangavelu, Mauro Corrado, Joy Edwards-Hicks, Katarzyna M. Grzes, Edward J. Pearce, Bruce R. Blazar, and Erika L. Pearce**

**Figure S1 (Related to Figure 1). Measurement of FABP3, 4 and 5 in *in vitro* differentiated Th cell subsets**

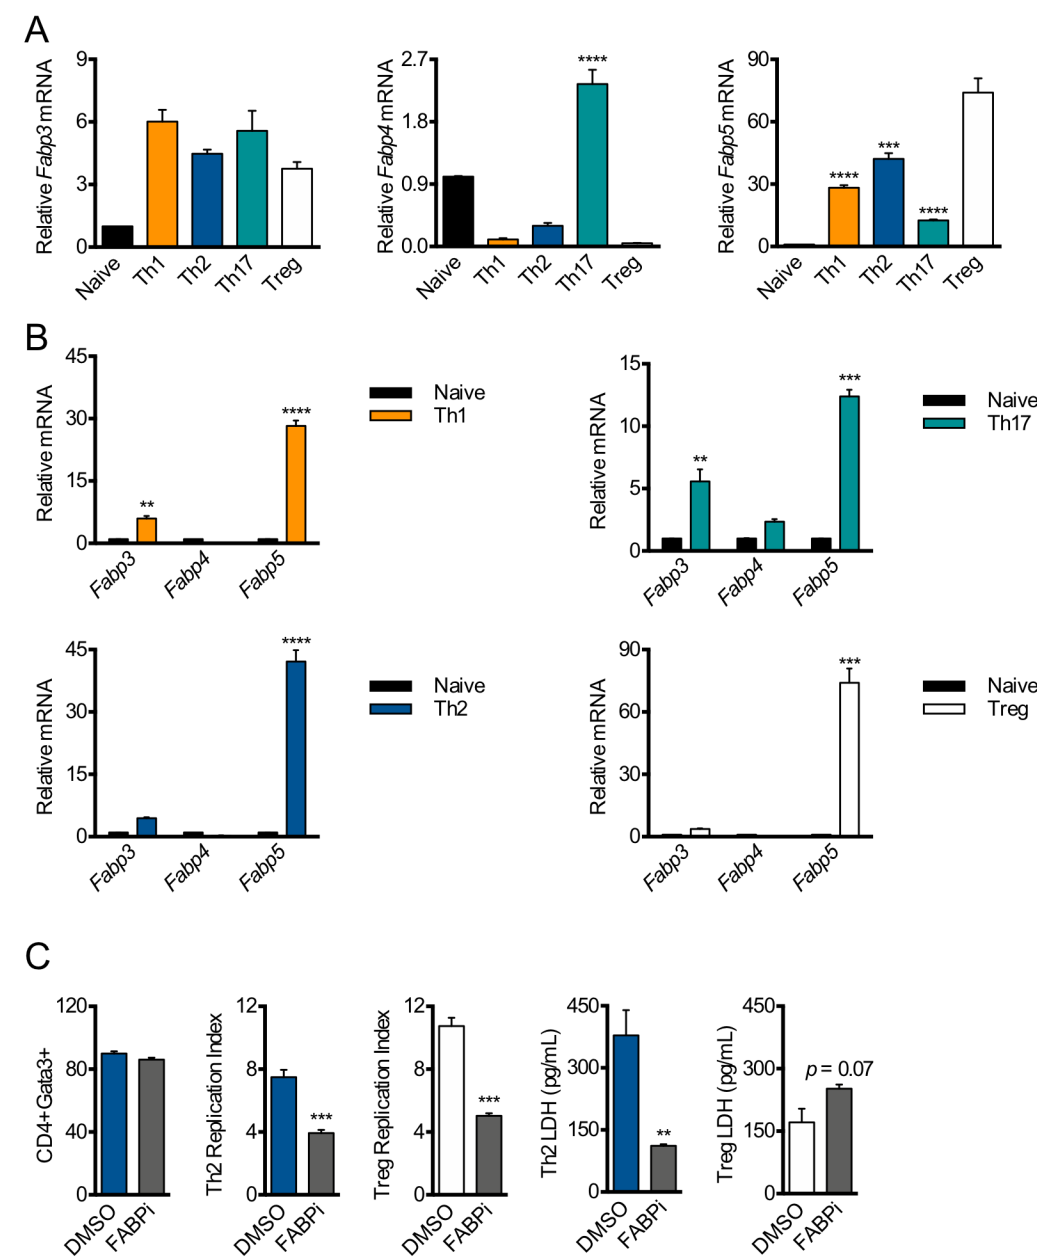

**Figure S1 (Related to Figure 1). Measurement of FABP3, 4 and 5 in *in vitro* differentiated Th cell subsets.** (A) Naïve CD4<sup>+</sup> T cells were cultured for four days under Th1, Th2, Th17 or Treg differentiation conditions. Mean relative expression ( $\pm$ SEM) of *Fabp3*, *Fabp4* or *Fabp5* mRNA in *in vitro* differentiated Th cell subsets compared to naïve CD4<sup>+</sup> T cells ( $n = 4$ ). Results represent two independent experiments. (B) Mean relative expression ( $\pm$ SEM) of *Fabp3*, *Fabp4* or *Fabp5* mRNA in *in vitro* differentiated Th cell subsets, on a per subset basis, compared to naïve CD4<sup>+</sup> T cells ( $n = 4$ ). Results represent two independent experiments. (C) Naïve CD4<sup>+</sup> T cells were cultured for three days under Th2, or Treg differentiation conditions in the presence of BMS309403 or vehicle control. Quantification of GATA3 expression, replication index ( $\pm$ SEM) and LDH from the supernatant of Th2 cells or Tregs cultured in the presence or absence of the FABP5 inhibitor BMS309403 ( $n = 4$ ). Results represent three independent experiments. \*  $P < 0.05$ , \*\*  $P < 0.01$ , \*\*\*  $P < 0.005$ , \*\*\*\*  $P < 0.001$ .  $P$  values were calculated using a two-way ANOVA with Bonferoni correction (A) or two-tailed, unpaired T test (B, C). For clarity, only significant differences between Tregs and Th subsets are depicted in (A).

**Figure S2 (Related to Figure 1). Bioenergetics of Tregs after BMS309403 treatment and of Tregs from *Fabp4/5* dKO mice.**

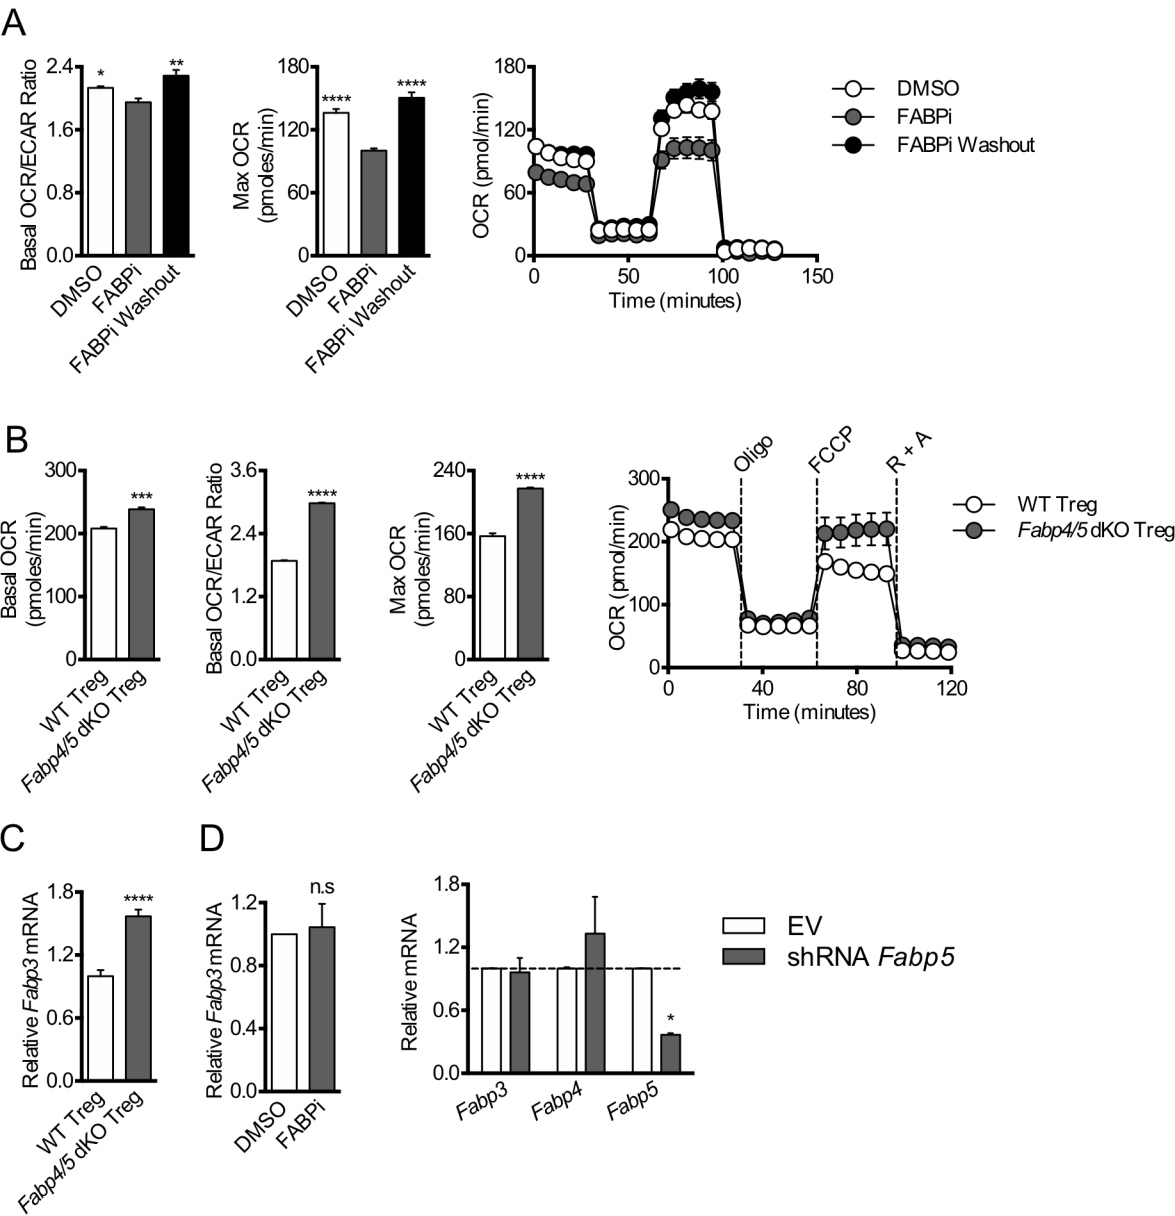

**Figure S2 (Related to Figure 1). Bioenergetics of Tregs after BMS309403 treatment and of Tregs from *Fabp4/5* dKO mice.** (A) Mean ( $\pm$ SEM) basal OCR, basal ECAR, OCR/ECAR ratio and maximal respiration (after FCCP) of *in vitro* differentiated mouse Tregs ( $n = 5$ ) following overnight FABP5 inhibition or FABP5 inhibitor wash out. Results represent two independent experiments. (B) Mean ( $\pm$ SEM) basal OCR, OCR/ECAR ratio and maximal respiration of *in vitro* differentiated Tregs from WT or *Fabp4/5* dKO mice. OCR of *in vitro* differentiated Tregs at baseline and in response to oligomycin (Oligo), FCCP, and rotenone and antimycin A (R + A) ( $n = 3$ ). Results represent two independent experiments. (C) Mean ( $\pm$ SEM) expression of *Fabp3* in WT or *Fabp4/5* dKO *in vitro* generated Tregs measured by qPCR ( $n = 3$ ). Results represent two independent experiments. (D) Mean ( $\pm$ SEM) expression of *Fabp3* in Tregs following overnight BMS309403 treatment measured by qPCR ( $n = 3$ ) and mean ( $\pm$ SEM) expression of *Fabp3*, *Fabp4* and *Fabp5* in Tregs following shRNA mediated knockdown of *Fabp5*. Results represent two independent experiments. Results represent two independent experiments. \*  $P < 0.05$ , \*\*  $P < 0.01$ , \*\*\*  $P < 0.005$ , \*\*\*\*  $P < 0.001$ .  $P$  values were calculated using a two-tailed, unpaired T test (A, B, C, D).

**Figure S3 (Related to Figures 1 and 2). IL-15 Tmem cells do not show metabolic defects following FABP5 inhibition.**

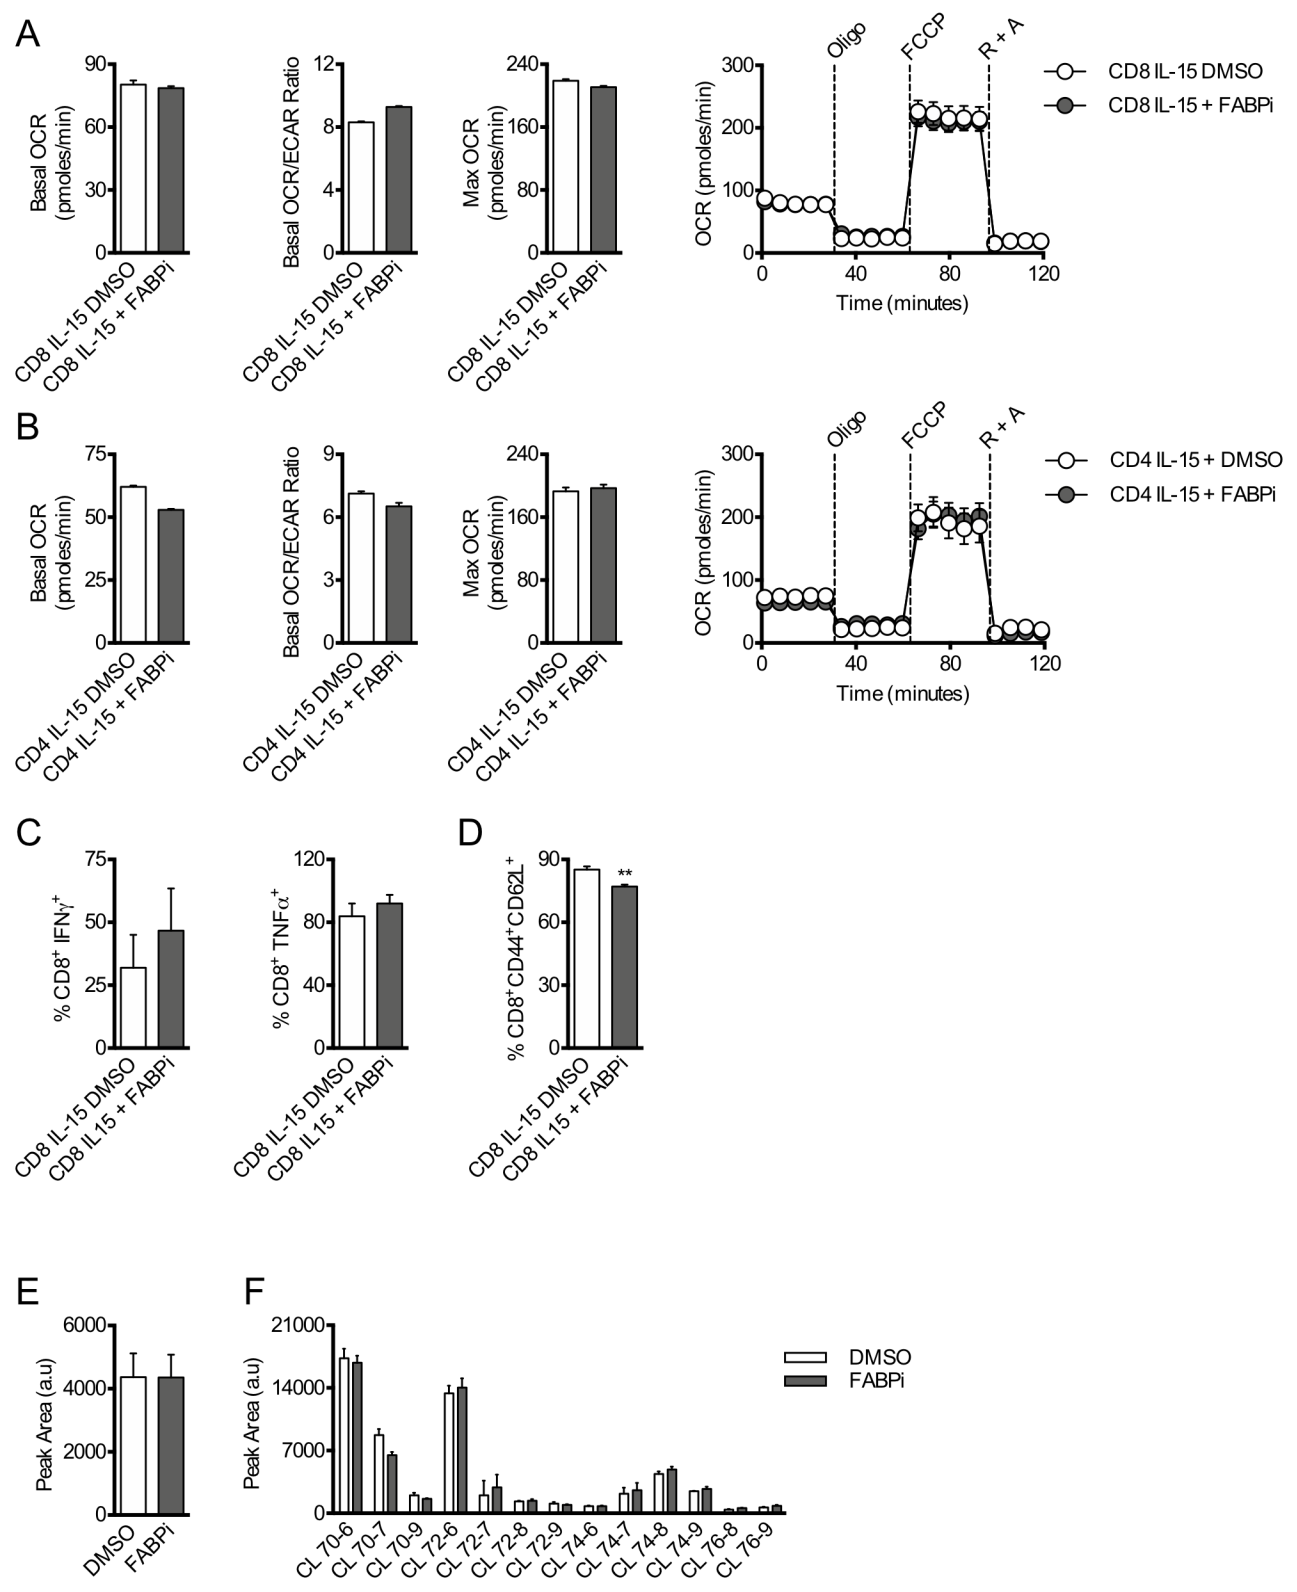

**Figure S3 (Related to Figures 1 and 2). IL-15 Tmem cells do not show metabolic defects following FABP5 inhibition.** Naïve CD8<sup>+</sup> or CD4<sup>+</sup> T cells were cultured with IL-2 for 3 days. Cells were then cultured in the presence of IL-15 from days 4-6 to generate *in vitro* Tmem cells, in the presence or absence of BMS309403. **(A)** Mean ( $\pm$ SEM) basal OCR, OCR/ECAR ratio and maximal respiration of *in vitro* differentiated CD8<sup>+</sup> Tmem cultured in the presence or absence of BMS309403 during IL-15 culture. OCR of *in vitro* differentiated CD8<sup>+</sup> Tmem cultured in the presence or absence of BMS309403 overnight at baseline and in response to oligomycin (Oligo), FCCP, and rotenone and antimycin A (R + A) ( $n = 4$ ). Results represent three independent experiments. **(B)** Mean ( $\pm$ SEM) basal OCR, OCR/ECAR ratio and maximal respiration of *in vitro* differentiated CD4<sup>+</sup> Tmem cultured in the presence or absence of BMS309403 during IL-15 culture. OCR of *in vitro* differentiated CD4<sup>+</sup> Tmem cultured in the presence or absence of BMS309403 overnight at baseline and in response to oligomycin (Oligo), FCCP, and rotenone and antimycin A (R + A) ( $n = 4$ ). Results represent three independent experiments. **(C)** Mean ( $\pm$ SEM) expression of IFN $\gamma$  and TNF $\alpha$  by Tmem cells cultured as **(A)** ( $n = 4$ ). Results represent two independent experiments. **(D)**. Mean ( $\pm$ SEM) expression of CD8<sup>+</sup>CD44<sup>+</sup>CD62L<sup>+</sup> by Tmem cells cultured as **(A)**. Results represent two independent experiments. \*  $P < 0.05$ , \*\*  $P < 0.01$ , \*\*\*  $P < 0.005$ , \*\*\*\*  $P < 0.001$ .  $P$  values were calculated using a two-tailed, unpaired T test **(A, B, C, D)**. **(E)** Mean ( $\pm$ SEM) quantification of total cardiolipin content in IL-15 cells ( $n = 4$ ). **(F)** Mean ( $\pm$ SEM) quantification of individual cardiolipin species in IL-15 cells ( $n = 4$ ). Results represent one experiment,  $P$  values were calculated using a two-tailed, unpaired T test **(E)** or a two-way ANOVA with Bonferroni correction **(F)**.

**Figure S4 (Related to Figure 4). Opa1-deficient Tregs have metabolic defects, but no type I IFN signaling.**

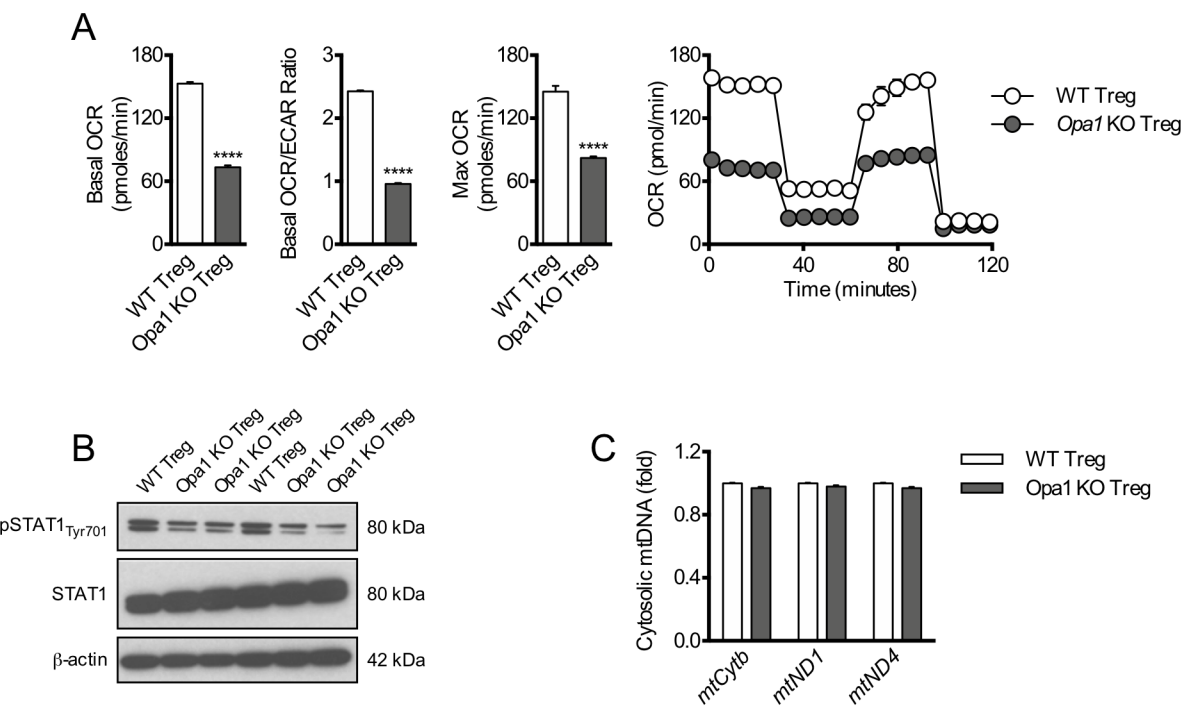

**Figure S4 (Related to Figure 4). Opa1-deficient Tregs have metabolic defects, but no type I IFN signaling.** Naïve CD4<sup>+</sup> T cells from WT or *Opa1*<sup>-/-</sup> mice were cultured for 4 days under Treg differentiation conditions before metabolic assessment. **(A)** Mean ( $\pm$ SEM) basal OCR, OCR/ECAR ratio and maximal respiration of *in vitro* differentiated Tregs from WT or *Opa1*<sup>-/-</sup> mice. OCR of *in vitro* differentiated Tregs from WT or *Opa1*<sup>-/-</sup> mice at baseline and in response to oligomycin (Oligo), FCCP, and rotenone and antimycin A (R + A) ( $n = 2-4$ ). **(B)** Protein expression of pSTAT1<sub>Tyr701</sub> in *in vitro* generated Tregs from WT or *Opa1*<sup>-/-</sup> mice. Results represent two independent experiments. **(C)** Quantification of cytosolic mtDNA content of WT or *Opa1*<sup>-/-</sup> Tregs ( $n = 4$ ). Results represent two independent experiments. \*\*\*\*  $P < 0.001$ .  $P$  values were calculated using a two-tailed, unpaired T test **(A)**.

**Figure S5 (Related to Figure 4). Type I interferon signaling induced by FABP5 inhibition is downstream of metabolic deficiencies.**

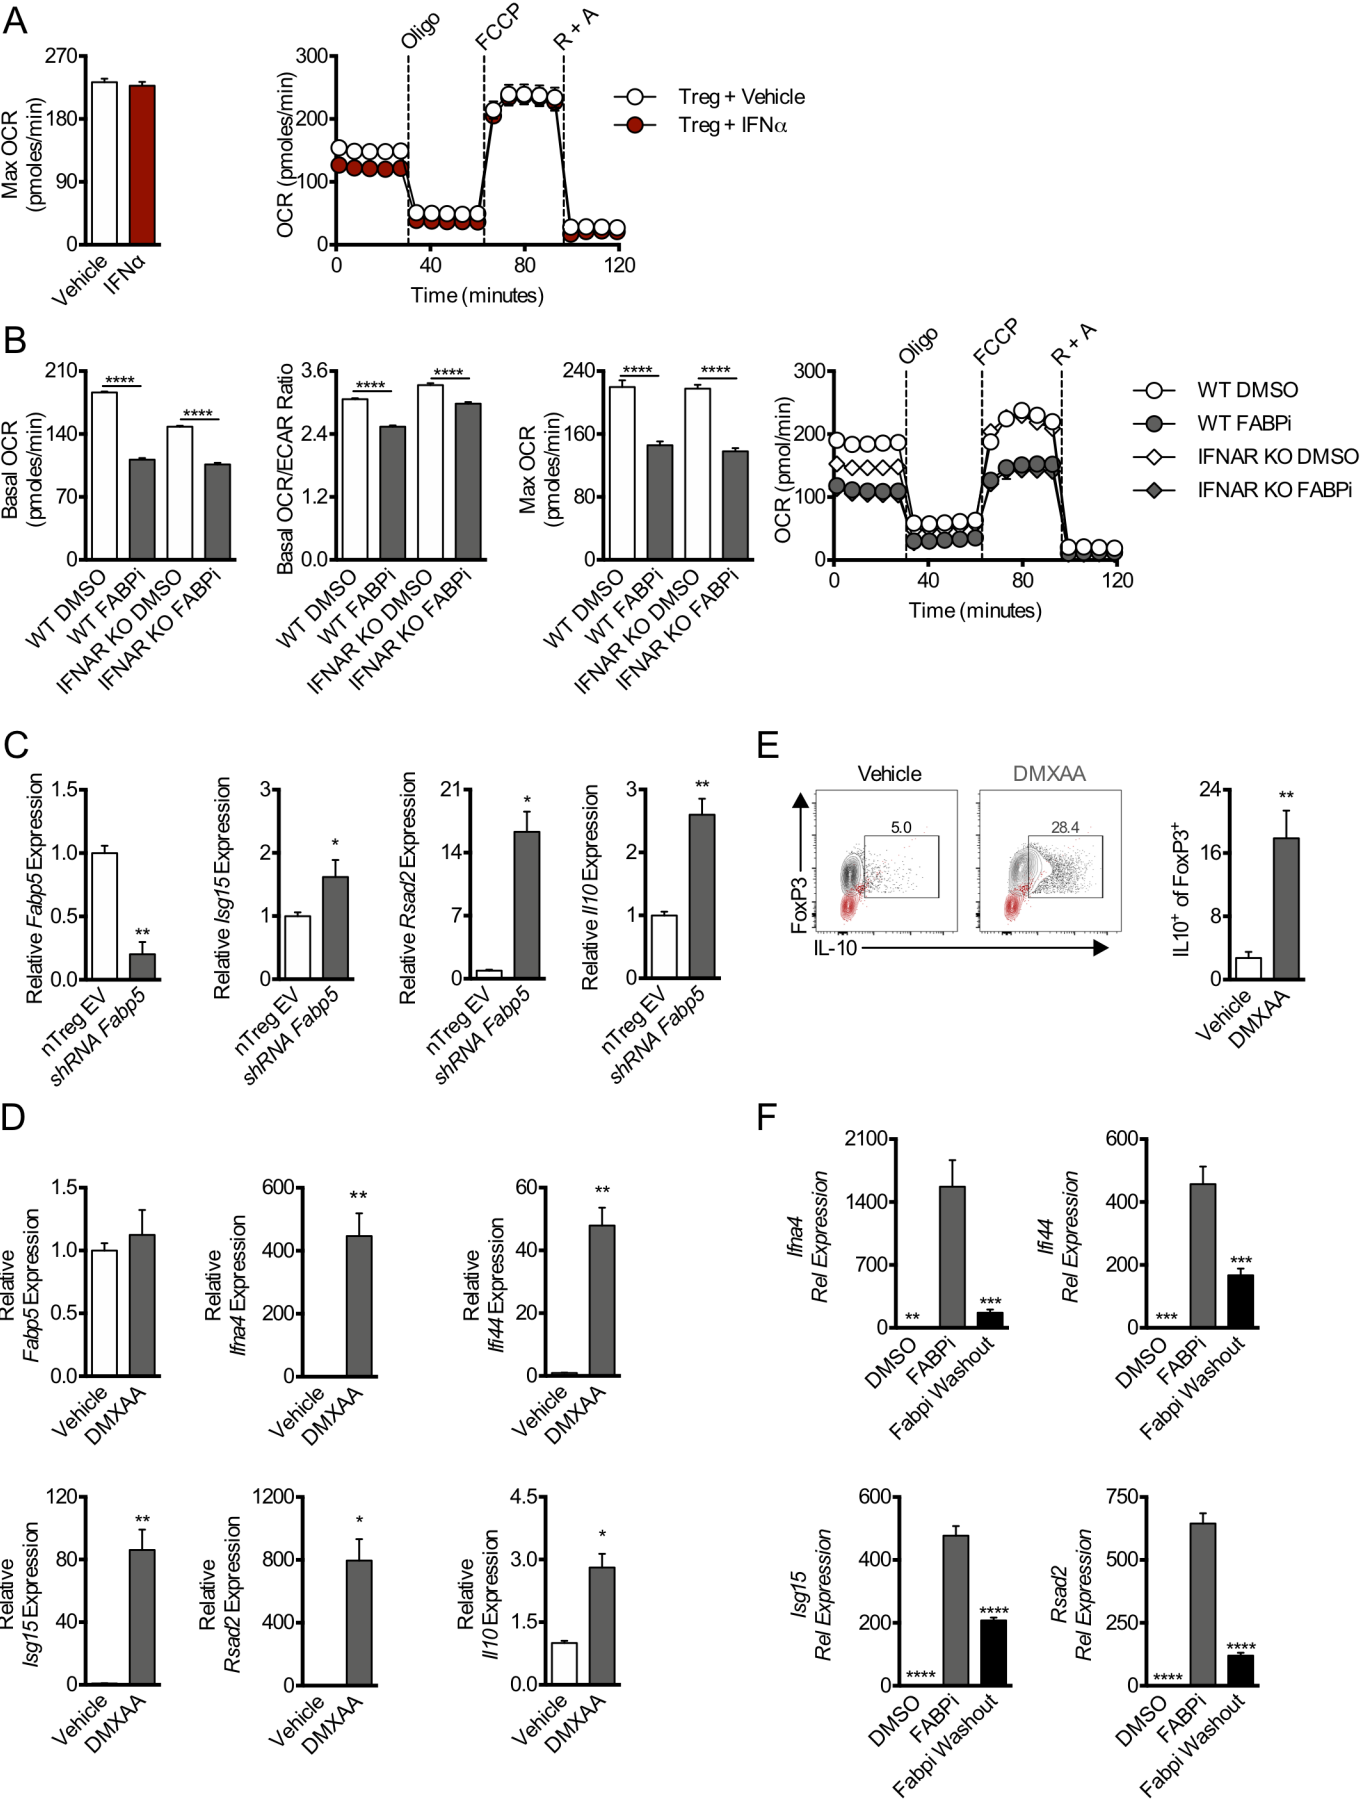

**Figure S5 (Related to Figure 4). Type I interferon signaling induced by FABP5 inhibition is downstream of metabolic deficiencies.** Naïve CD4<sup>+</sup> T cells were cultured for 3 days under Treg cell differentiation conditions before overnight IFN $\alpha$  treatment. **(A)** Mean ( $\pm$ SEM) maximal respiration (after FCCP) and OCR of *in vitro* differentiated murine Tregs cultured in the presence or absence of IFN $\alpha$  at baseline and in response to oligomycin (Oligo), FCCP, and rotenone and antimycin A (R + A) ( $n = 4$ ). Results represent three independent experiments. **(B)** Mean ( $\pm$ SEM) basal OCR, OCR/ECAR ratio and maximal respiration (after FCCP) of *in vitro* differentiated murine Tregs from WT or IFNAR KO mice following acute FABP5 blockade at baseline and in response to oligomycin (Oligo), FCCP, and rotenone and antimycin A (R + A) ( $n = 4$ ). Results represent three independent experiments. **(C)** Mean ( $\pm$ SEM) expression of *Fabp5* and type I IFN related genes in nTregs after shRNA against *Fabp5* measured by qPCR ( $n = 4$ ). Results represent two independent experiments. **(D)** Mean ( $\pm$ SEM) expression of type I IFN related genes in Tregs after DMXAA treatment measured by qPCR ( $n = 4$ ). Results represent two independent experiments. **(E)** Mean ( $\pm$ SEM) protein expression of IL-10 in Tregs following after overnight DMXAA treatment ( $n = 5$ ). Results represent two independent experiments. Gating controls depicted in red. **(F)** Mean ( $\pm$ SEM) expression of type I IFN related genes in Tregs after BMS309403 treatment, or BMS309403 washout measured by qPCR ( $n = 4$ ). Results represent two independent experiments. \*  $P < 0.05$ , \*\*  $P < 0.01$ , \*\*\*  $P < 0.005$ , \*\*\*\*  $P < 0.001$ .  $P$  values were calculated using a two-tailed, unpaired T test (**A, B, C, D, E**) or one-way ANOVA with Bonferroni correction (**F**).
